# Supplementary material
Source: PubMed Central journal article supplement (PMC4714420)
Supplement: NIHMS749711-supplement-2.pdf [file NIHMS749711-supplement-2.pdf]

# Supplement to “Power Enhancement in High Dimensional Cross-Sectional Tests”

Jianqing Fan <sup>†</sup>, Yuan Liao <sup>‡</sup> and Jiawei Yao <sup>\*</sup>

<sup>\*</sup>Department of Operations Research and Financial Engineering, Princeton University

<sup>†</sup> Bendheim Center for Finance, Princeton University

<sup>‡</sup> Department of Mathematics, University of Maryland <sup>\*</sup>

## Abstract

This supplementary material contains additional proofs of the main paper.

## 1 Auxiliary lemmas for the proof of Proposition ??

Define  $\mathbf{e}_t = \boldsymbol{\Sigma}_u^{-1} \mathbf{u}_t = (e_{1t}, \dots, e_{Nt})'$ , which is an  $N$ -dimensional vector with mean zero and covariance  $\boldsymbol{\Sigma}_u^{-1}$ , whose entries are stochastically bounded. Let  $\bar{\mathbf{w}} = (E\mathbf{f}_t \mathbf{f}_t')^{-1} E\mathbf{f}_t$ . Also recall that

$$a_1 = \frac{T}{\sqrt{N}} \sum_{i=1}^N (\hat{\boldsymbol{\theta}}' \boldsymbol{\Sigma}_u^{-1})_i^2 (\hat{\sigma}_{ii} - \sigma_{ii}),$$
$$a_2 = \frac{T}{\sqrt{N}} \sum_{i \neq j, (i,j) \in S_U} (\hat{\boldsymbol{\theta}}' \boldsymbol{\Sigma}_u^{-1})_i (\hat{\boldsymbol{\theta}}' \boldsymbol{\Sigma}_u^{-1})_j (\hat{\sigma}_{ij} - \sigma_{ij}).$$

---

<sup>\*</sup>Address: Department of Operations Research and Financial Engineering, Sherrerd Hall, Princeton University, Princeton, NJ 08544, USA. Department of Mathematics, University of Maryland, College Park, MD 20742, USA. E-mail: [jqfan@princeton.edu](mailto:jqfan@princeton.edu), [yuanliao@umd.edu](mailto:yuanliao@umd.edu), [jiaweiy@princeton.edu](mailto:jiaweiy@princeton.edu).

One of the key steps of proving  $a_1 = o_P(1)$ ,  $a_2 = o_P(1)$  is to establish the following two convergences:

$$\frac{1}{T}E\left|\frac{1}{\sqrt{NT}}\sum_{i=1}^N\sum_{t=1}^T(u_{it}^2 - Eu_{it}^2)\left(\frac{1}{\sqrt{T}}\sum_{s=1}^Te_{is}(1 - \mathbf{f}'_s\bar{\mathbf{w}})\right)^2\right|^2 = o(1), \quad (1.1)$$

$$\frac{1}{T}E\left|\frac{1}{\sqrt{NT}}\sum_{i \neq j, (i,j) \in S_U}\sum_{t=1}^T(u_{it}u_{jt} - Eu_{it}u_{jt})\left[\frac{1}{\sqrt{T}}\sum_{s=1}^Te_{is}(1 - \mathbf{f}'_s\bar{\mathbf{w}})\right]\left[\frac{1}{\sqrt{T}}\sum_{k=1}^Te_{jk}(1 - \mathbf{f}'_k\bar{\mathbf{w}})\right]\right|^2 = o(1), \quad (1.2)$$

where  $S_U = \{(i, j) : (\boldsymbol{\Sigma}_u)_{ij} \neq 0\}$ . The proofs of (1.1) and (1.2) are given later below.

**Lemma 1.1.** *Under  $H_0$ ,  $a_1 = o_P(1)$ .*

*Proof.* We have  $a_1 = \frac{T}{\sqrt{N}}\sum_{i=1}^N(\hat{\boldsymbol{\theta}}'\boldsymbol{\Sigma}_u^{-1})_i^2\frac{1}{T}\sum_{t=1}^T(\hat{u}_{it}^2 - Eu_{it}^2)$ , which is

$$\frac{T}{\sqrt{N}}\sum_{i=1}^N(\hat{\boldsymbol{\theta}}'\boldsymbol{\Sigma}_u^{-1})_i^2\frac{1}{T}\sum_{t=1}^T(\hat{u}_{it}^2 - u_{it}^2) + \frac{T}{\sqrt{N}}\sum_{i=1}^N(\hat{\boldsymbol{\theta}}'\boldsymbol{\Sigma}_u^{-1})_i^2\frac{1}{T}\sum_{t=1}^T(u_{it}^2 - Eu_{it}^2) = a_{11} + a_{12}.$$

For  $a_{12}$ , note that  $(\hat{\boldsymbol{\theta}}'\boldsymbol{\Sigma}_u^{-1})_i = (1 - \bar{\mathbf{f}}'\bar{\mathbf{w}})^{-1}\frac{1}{T}\sum_{s=1}^T(1 - \mathbf{f}'_s\bar{\mathbf{w}})(\mathbf{u}'_s\boldsymbol{\Sigma}_u^{-1})_i = c\frac{1}{T}\sum_{s=1}^T(1 - \mathbf{f}'_s\bar{\mathbf{w}})e_{is}$ , where  $c = (1 - \bar{\mathbf{f}}'\bar{\mathbf{w}})^{-1} = O_P(1)$ . Hence

$$a_{12} = \frac{Tc}{\sqrt{N}}\sum_{i=1}^N\left(\frac{1}{T}\sum_{s=1}^T(1 - \mathbf{f}'_s\bar{\mathbf{w}})e_{is}\right)^2\frac{1}{T}\sum_{t=1}^T(u_{it}^2 - Eu_{it}^2)$$

By (1.1),  $Ea_{12}^2 = o(1)$ . On the other hand,

$$a_{11} = \frac{T}{\sqrt{N}}\sum_{i=1}^N(\hat{\boldsymbol{\theta}}'\boldsymbol{\Sigma}_u^{-1})_i^2\frac{1}{T}\sum_{t=1}^T(\hat{u}_{it} - u_{it})^2 + \frac{2T}{\sqrt{N}}\sum_{i=1}^N(\hat{\boldsymbol{\theta}}'\boldsymbol{\Sigma}_u^{-1})_i^2\frac{1}{T}\sum_{t=1}^Tu_{it}(\hat{u}_{it} - u_{it}) = a_{111} + a_{112}.$$

Note that  $\max_{i \leq N}\frac{1}{T}\sum_{t=1}^T(\hat{u}_{it} - u_{it})^2 = O_P(\frac{\log N}{T})$  by Lemma 3.1 of ?. Since  $\|\hat{\boldsymbol{\theta}}\|^2 = O_P(\frac{N \log N}{T})$ ,  $\|\boldsymbol{\Sigma}_u^{-1}\|_2 = O(1)$  and  $N(\log N)^3 = o(T^2)$ ,

$$a_{111} \leq O_P\left(\frac{\log N}{T}\right)\frac{T}{\sqrt{N}}\|\hat{\boldsymbol{\theta}}'\boldsymbol{\Sigma}_u^{-1}\|^2 = O_P\left(\frac{(\log N)^2\sqrt{N}}{T}\right) = o_P(1),$$

To bound  $a_{112}$ , note that

$$\widehat{u}_{it} - u_{it} = \widehat{\theta}_i - \theta_i + (\widehat{\mathbf{b}}_i - \mathbf{b}_i)' \mathbf{f}_t, \quad \max_i |\widehat{\theta}_i - \theta_i| = O_P\left(\sqrt{\frac{\log N}{T}}\right) = \max_i \|\widehat{\mathbf{b}}_i - \mathbf{b}_i\|.$$

Also,  $\max_i \left| \frac{1}{T} \sum_{t=1}^T u_{it} \right| = O_P\left(\sqrt{\frac{\log N}{T}}\right) = \max_i \left\| \frac{1}{T} \sum_{t=1}^T u_{it} \mathbf{f}_t \right\|$ . Hence

$$\begin{aligned} a_{112} &= \frac{2T}{\sqrt{N}} \sum_{i=1}^N (\widehat{\boldsymbol{\theta}}' \boldsymbol{\Sigma}_u^{-1})_i^2 \frac{1}{T} \sum_{t=1}^T u_{it} (\widehat{\theta}_i - \theta_i) + \frac{2T}{\sqrt{N}} \sum_{i=1}^N (\widehat{\boldsymbol{\theta}}' \boldsymbol{\Sigma}_u^{-1})_i^2 (\widehat{\mathbf{b}}_i - \mathbf{b}_i)' \frac{1}{T} \sum_{t=1}^T \mathbf{f}_t u_{it} \\ &\leq O_P\left(\frac{\log N}{\sqrt{N}}\right) \|\widehat{\boldsymbol{\theta}}' \boldsymbol{\Sigma}_u^{-1}\|^2 = o_P(1). \end{aligned}$$

In summary,  $a_1 = a_{12} + a_{111} + a_{112} = o_P(1)$ .  $\square$

**Lemma 1.2.** Under  $H_0$ ,  $a_2 = o_P(1)$ .

*Proof.* We have  $a_2 = \frac{T}{\sqrt{N}} \sum_{i \neq j, (i,j) \in S_U} (\widehat{\boldsymbol{\theta}}' \boldsymbol{\Sigma}_u^{-1})_i (\widehat{\boldsymbol{\theta}}' \boldsymbol{\Sigma}_u^{-1})_j \frac{1}{T} \sum_{t=1}^T (\widehat{u}_{it} \widehat{u}_{jt} - E u_{it} u_{jt})$ , which is

$$\frac{T}{\sqrt{N}} \sum_{i \neq j, (i,j) \in S_U} (\widehat{\boldsymbol{\theta}}' \boldsymbol{\Sigma}_u^{-1})_i (\widehat{\boldsymbol{\theta}}' \boldsymbol{\Sigma}_u^{-1})_j \left( \frac{1}{T} \sum_{t=1}^T (\widehat{u}_{it} \widehat{u}_{jt} - u_{it} u_{jt}) + \frac{1}{T} \sum_{t=1}^T (u_{it} u_{jt} - E u_{it} u_{jt}) \right) = a_{21} + a_{22}.$$

where

$$a_{21} = \frac{T}{\sqrt{N}} \sum_{i \neq j, (i,j) \in S_U} (\widehat{\boldsymbol{\theta}}' \boldsymbol{\Sigma}_u^{-1})_i (\widehat{\boldsymbol{\theta}}' \boldsymbol{\Sigma}_u^{-1})_j \frac{1}{T} \sum_{t=1}^T (\widehat{u}_{it} \widehat{u}_{jt} - u_{it} u_{jt}).$$

Under  $H_0$ ,  $\boldsymbol{\Sigma}_u^{-1} \widehat{\boldsymbol{\theta}} = \frac{1}{T} (1 - \bar{\mathbf{f}}' \mathbf{w})^{-1} \sum_{t=1}^T \boldsymbol{\Sigma}_u^{-1} \mathbf{u}_t (1 - \mathbf{f}_t' \mathbf{w})$ , and  $\mathbf{e}_t = \boldsymbol{\Sigma}_u^{-1} \mathbf{u}_t$ , we have

$$\begin{aligned} a_{22} &= \frac{T}{\sqrt{N}} \sum_{i \neq j, (i,j) \in S_U} (\widehat{\boldsymbol{\theta}}' \boldsymbol{\Sigma}_u^{-1})_i (\widehat{\boldsymbol{\theta}}' \boldsymbol{\Sigma}_u^{-1})_j \frac{1}{T} \sum_{t=1}^T (u_{it} u_{jt} - E u_{it} u_{jt}) \\ &= \frac{Tc}{\sqrt{N}} \sum_{i \neq j, (i,j) \in S_U} \frac{1}{T} \sum_{s=1}^T (1 - \mathbf{f}_s' \mathbf{w}) e_{is} \frac{1}{T} \sum_{k=1}^T (1 - \mathbf{f}_k' \mathbf{w}) e_{jk} \frac{1}{T} \sum_{t=1}^T (u_{it} u_{jt} - E u_{it} u_{jt}). \end{aligned}$$

By (1.2),  $E a_{22}^2 = o(1)$ .

On the other hand,  $a_{21} = a_{211} + a_{212}$ , where

$$a_{211} = \frac{T}{\sqrt{N}} \sum_{i \neq j, (i,j) \in S_U} (\widehat{\boldsymbol{\theta}}' \boldsymbol{\Sigma}_u^{-1})_i (\widehat{\boldsymbol{\theta}}' \boldsymbol{\Sigma}_u^{-1})_j \frac{1}{T} \sum_{t=1}^T (\widehat{u}_{it} - u_{it})(\widehat{u}_{jt} - u_{jt}),$$

$$a_{212} = \frac{2T}{\sqrt{N}} \sum_{i \neq j, (i,j) \in S_U} (\hat{\boldsymbol{\theta}}' \boldsymbol{\Sigma}_u^{-1})_i (\hat{\boldsymbol{\theta}}' \boldsymbol{\Sigma}_u^{-1})_j \frac{1}{T} \sum_{t=1}^T u_{it} (\hat{u}_{jt} - u_{jt}).$$

By the Cauchy-Schwarz inequality,  $\max_{ij} |\frac{1}{T} \sum_{t=1}^T (\hat{u}_{it} - u_{it})(\hat{u}_{jt} - u_{jt})| = O_P(\frac{\log N}{T})$ . Hence

$$\begin{aligned} |a_{211}| &\leq O_P\left(\frac{\log N}{\sqrt{N}}\right) \sum_{i \neq j, (i,j) \in S_U} |(\hat{\boldsymbol{\theta}}' \boldsymbol{\Sigma}_u^{-1})_i| |(\hat{\boldsymbol{\theta}}' \boldsymbol{\Sigma}_u^{-1})_j| \\ &\leq O_P\left(\frac{\log N}{\sqrt{N}}\right) \left( \sum_{i \neq j, (i,j) \in S_U} (\hat{\boldsymbol{\theta}}' \boldsymbol{\Sigma}_u^{-1})_i^2 \right)^{1/2} \left( \sum_{i \neq j, (i,j) \in S_U} (\hat{\boldsymbol{\theta}}' \boldsymbol{\Sigma}_u^{-1})_j^2 \right)^{1/2} \\ &= O_P\left(\frac{\log N}{\sqrt{N}}\right) \sum_{i=1}^N (\hat{\boldsymbol{\theta}}' \boldsymbol{\Sigma}_u^{-1})_i^2 \sum_{j: (\boldsymbol{\Sigma}_u)_{ij} \neq 0} 1 \leq O_P\left(\frac{\log N}{\sqrt{N}}\right) \|\hat{\boldsymbol{\theta}}' \boldsymbol{\Sigma}_u^{-1}\|^2 m_N \\ &= O_P\left(\frac{m_N \sqrt{N} (\log N)^2}{T}\right) = o_P(1). \end{aligned}$$

Similar to the proof of term  $a_{112}$  in Lemma 1.1,  $\max_{ij} |\frac{1}{T} \sum_{t=1}^T u_{it} (\hat{u}_{jt} - u_{jt})| = O_P(\frac{\log N}{T})$ .

$$|a_{212}| \leq O_P\left(\frac{\log N}{\sqrt{N}}\right) \sum_{i \neq j, (i,j) \in S_U} |(\hat{\boldsymbol{\theta}}' \boldsymbol{\Sigma}_u^{-1})_i| |(\hat{\boldsymbol{\theta}}' \boldsymbol{\Sigma}_u^{-1})_j| = O_P\left(\frac{m_N \sqrt{N} (\log N)^2}{T}\right) = o_P(1).$$

In summary,  $a_2 = a_{22} + a_{211} + a_{212} = o_P(1)$ .  $\square$

## 1.1 Proof of (1.1) and (1.2)

For any index set  $A$ , we let  $|A|_0$  denote its number of elements.

**Lemma 1.3.** *Recall that  $\mathbf{e}_t = \boldsymbol{\Sigma}_u^{-1} \mathbf{u}_t$ .  $e_{it}$  and  $u_{jt}$  are independent if  $i \neq j$ .*

*Proof.* Because  $\mathbf{u}_t$  is Gaussian, it suffices to show that  $\text{cov}(e_{it}, u_{jt}) = 0$  when  $i \neq j$ . Consider the vector  $(\mathbf{u}'_t, \mathbf{e}'_t)' = \mathbf{A}(\mathbf{u}'_t, \mathbf{u}'_t)'$ , where

$$\mathbf{A} = \begin{pmatrix} \mathbf{I}_N & 0 \\ 0 & \boldsymbol{\Sigma}_u^{-1} \end{pmatrix}.$$

Then  $\text{cov}(\mathbf{u}'_t, \mathbf{e}'_t) = \mathbf{A}\text{cov}(\mathbf{u}'_t, \mathbf{u}'_t)\mathbf{A}$ , which is

$$\begin{pmatrix} \mathbf{I}_N & 0 \\ 0 & \Sigma_u^{-1} \end{pmatrix} \begin{pmatrix} \Sigma_u & \Sigma_u \\ \Sigma_u & \Sigma_u \end{pmatrix} \begin{pmatrix} \mathbf{I}_N & 0 \\ 0 & \Sigma_u^{-1} \end{pmatrix} = \begin{pmatrix} \Sigma_u & \mathbf{I}_N \\ \mathbf{I}_N & \Sigma_u^{-1} \end{pmatrix}.$$

This completes the proof.  $\square$

### Proof of (1.1)

Let  $X = \frac{1}{\sqrt{NT}} \sum_{i=1}^N \sum_{t=1}^T (u_{it}^2 - Eu_{it}^2) (\frac{1}{\sqrt{T}} \sum_{s=1}^T e_{is}(1 - \mathbf{f}'_s \mathbf{w}))^2$ . The goal is to show  $EX^2 = o(T)$ . We show respectively  $\frac{1}{T}(EX)^2 = o(1)$  and  $\frac{1}{T}\text{var}(X) = o(1)$ . The proof of (1.1) is the same regardless of the type of sparsity in Assumption ???. For notational simplicity, let

$$\xi_{it} = u_{it}^2 - Eu_{it}^2, \quad \zeta_{is} = e_{is}(1 - \mathbf{f}'_s \mathbf{w}).$$

Then  $X = \frac{1}{\sqrt{NT}} \sum_{i=1}^N \sum_{t=1}^T \xi_{it} (\frac{1}{\sqrt{T}} \sum_{s=1}^T \zeta_{is})^2$ . Because of the serial independence,  $\xi_{it}$  is independent of  $\zeta_{js}$  if  $t \neq s$ , for any  $i, j \leq N$ , which implies  $\text{cov}(\xi_{it}, \zeta_{is}\zeta_{ik}) = 0$  as long as either  $s \neq t$  or  $k \neq t$ .

### Expectation

For the expectation,

$$\begin{aligned} EX &= \frac{1}{\sqrt{NT}} \sum_{i=1}^N \sum_{t=1}^T \text{cov}(\xi_{it}, (\frac{1}{\sqrt{T}} \sum_{s=1}^T \zeta_{is})^2) = \frac{1}{T\sqrt{NT}} \sum_{i=1}^N \sum_{t=1}^T \sum_{s=1}^T \sum_{k=1}^T \text{cov}(\xi_{it}, \zeta_{is}\zeta_{ik}) \\ &= \frac{1}{T\sqrt{NT}} \sum_{i=1}^N \sum_{t=1}^T (\text{cov}(\xi_{it}, \zeta_{it}^2) + 2 \sum_{k \neq t} \text{cov}(\xi_{it}, \zeta_{it}\zeta_{ik})) \\ &= \frac{1}{T\sqrt{NT}} \sum_{i=1}^N \sum_{t=1}^T \text{cov}(\xi_{it}, \zeta_{it}^2) = O(\sqrt{\frac{N}{T}}), \end{aligned}$$

where the second last equality follows since  $E\xi_{it} = E\zeta_{it} = 0$  and when  $k \neq t$   $\text{cov}(\xi_{it}, \zeta_{it}\zeta_{ik}) = E\xi_{it}\zeta_{it}\zeta_{ik} = E\xi_{it}\zeta_{it}E\zeta_{ik} = 0$ . It then follows that  $\frac{1}{T}(EX)^2 = O(\frac{N}{T^2}) = o(1)$ , given  $N = o(T^2)$ .

### Variance

Consider the variance. We have,

$$\text{var}(X) = \frac{1}{N} \sum_{i=1}^N \text{var}(\frac{1}{\sqrt{T}} \sum_{t=1}^T \xi_{it} (\frac{1}{\sqrt{T}} \sum_{s=1}^T \zeta_{is})^2)$$

$$+ \frac{1}{NT^3} \sum_{i \neq j} \sum_{t,s,k,l,v,p \leq T} \text{cov}(\xi_{it}\zeta_{is}\zeta_{ik}, \xi_{jl}\zeta_{jv}\zeta_{jp}) = B_1 + B_2.$$

$B_1$  can be bounded by the Cauchy-Schwarz inequality. Note that  $E\xi_{it} = E\zeta_{js} = 0$ ,

$$B_1 \leq \frac{1}{N} \sum_{i=1}^N E \left( \frac{1}{\sqrt{T}} \sum_{t=1}^T \xi_{it} \left( \frac{1}{\sqrt{T}} \sum_{s=1}^T \zeta_{is} \right)^2 \right)^2 \leq \frac{1}{N} \sum_{i=1}^N [E \left( \frac{1}{\sqrt{T}} \sum_{t=1}^T \xi_{it} \right)^4]^{1/2} [E \left( \frac{1}{\sqrt{T}} \sum_{s=1}^T \zeta_{is} \right)^8]^{1/2}.$$

Hence  $B_1 = O(1)$ .

We now show  $\frac{1}{T}B_2 = o(1)$ . Once this is done, it implies  $\frac{1}{T}\text{var}(X) = o(1)$ . The proof of (1.1) is then completed because  $\frac{1}{T}EX^2 = \frac{1}{T}(EX)^2 + \frac{1}{T}\text{var}(X) = o(1)$ .

For two variables  $X, Y$ , writing  $X \perp Y$  if they are independent. Note that  $E\xi_{it} = E\zeta_{is} = 0$ , and when  $t \neq s$ ,  $\xi_{it} \perp \zeta_{js}$ ,  $\xi_{it} \perp \xi_{js}$ ,  $\zeta_{it} \perp \zeta_{js}$  for any  $i, j \leq N$ . Therefore, it is straightforward to verify that if the set  $\{t, s, k, l, v, p\}$  contains more than three distinct elements, then  $\text{cov}(\xi_{it}\zeta_{is}\zeta_{ik}, \xi_{jl}\zeta_{jv}\zeta_{jp}) = 0$ . Hence if we denote  $\Xi$  as the set of  $(t, s, k, l, v, p)$  such that  $\{t, s, k, l, v, p\}$  contains no more than three distinct elements, then its cardinality satisfies:  $|\Xi|_0 \leq CT^3$  for some  $C > 1$ , and

$$\sum_{t,s,k,l,v,p \leq T} \text{cov}(\xi_{it}\zeta_{is}\zeta_{ik}, \xi_{jl}\zeta_{jv}\zeta_{jp}) = \sum_{(t,s,k,l,v,p) \in \Xi} \text{cov}(\xi_{it}\zeta_{is}\zeta_{ik}, \xi_{jl}\zeta_{jv}\zeta_{jp}).$$

Hence

$$B_2 = \frac{1}{NT^3} \sum_{i \neq j} \sum_{(t,s,k,l,v,p) \in \Xi} \text{cov}(\xi_{it}\zeta_{is}\zeta_{ik}, \xi_{jl}\zeta_{jv}\zeta_{jp}).$$

Let us partition  $\Xi$  into  $\Xi_1 \cup \Xi_2$  where each element  $(t, s, k, l, v, p)$  in  $\Xi_1$  contains exactly three distinct indices, while each element in  $\Xi_2$  contains less than three distinct indices. We know that  $\frac{1}{NT^3} \sum_{i \neq j} \sum_{(t,s,k,l,v,p) \in \Xi_2} \text{cov}(\xi_{it}\zeta_{is}\zeta_{ik}, \xi_{jl}\zeta_{jv}\zeta_{jp}) = O(\frac{1}{NT^3} N^2 T^2) = O(\frac{N}{T})$ , which implies

$$\frac{1}{T}B_2 = \frac{1}{NT^4} \sum_{i \neq j} \sum_{(t,s,k,l,v,p) \in \Xi_1} \text{cov}(\xi_{it}\zeta_{is}\zeta_{ik}, \xi_{jl}\zeta_{jv}\zeta_{jp}) + O_p\left(\frac{N}{T^2}\right).$$

The first term on the right hand side can be written as  $\sum_{h=1}^5 B_{2h}$ . Each of these five terms is defined and analyzed separately as below.

$$B_{21} = \frac{1}{NT^4} \sum_{i \neq j} \sum_{t=1}^T \sum_{s \neq t} \sum_{l \neq s,t} E\xi_{it}\xi_{jt} E\zeta_{is}^2 E\zeta_{jl}^2 \leq O\left(\frac{1}{NT}\right) \sum_{i \neq j} |E\xi_{it}\xi_{jt}|.$$

Note that if  $(\Sigma_u)_{ij} = 0$ ,  $u_{it}$  and  $u_{jt}$  are independent, and hence  $E\xi_{it}\xi_{jt} = 0$ . This implies  $\sum_{i \neq j} |E\xi_{it}\xi_{jt}| \leq O(1) \sum_{i \neq j, (i,j) \in S_U} 1 = O(N)$ . Hence  $B_{21} = o(1)$ .

$$B_{22} = \frac{1}{NT^4} \sum_{i \neq j} \sum_{t=1}^T \sum_{s \neq t} \sum_{l \neq s,t} E\xi_{it}\zeta_{it} E\zeta_{is}\xi_{js} E\zeta_{jl}^2.$$

By Lemma 1.3,  $u_{js}$  and  $e_{is}$  are independent for  $i \neq j$ . Also,  $u_{js}$  and  $\mathbf{f}_s$  are independent, which implies  $\xi_{js}$  and  $\zeta_{is}$  are independent. So  $E\xi_{js}\zeta_{is} = 0$ . It follows that  $B_{22} = 0$ .

$$\begin{aligned} B_{23} &= \frac{1}{NT^4} \sum_{i \neq j} \sum_{t=1}^T \sum_{s \neq t} \sum_{l \neq s,t} E\xi_{it}\zeta_{it} E\zeta_{is}\zeta_{js} E\xi_{jl}\zeta_{jl} = O\left(\frac{1}{NT}\right) \sum_{i \neq j} |E\zeta_{is}\zeta_{js}| \\ &= O\left(\frac{1}{NT}\right) \sum_{i \neq j} |Ee_{is}e_{js}E(1 - \mathbf{f}'_s \mathbf{w})^2| = O\left(\frac{1}{NT}\right) \sum_{i \neq j} |Ee_{is}e_{js}|. \end{aligned}$$

By the definition  $\mathbf{e}_s = \Sigma_u^{-1} \mathbf{u}_s$ ,  $\text{cov}(\mathbf{e}_s) = \Sigma_u^{-1}$ . Hence  $Ee_{is}e_{js} = (\Sigma_u^{-1})_{ij}$ , which implies  $B_{23} \leq O\left(\frac{N}{NT}\right) \|\Sigma_u^{-1}\|_1 = o(1)$ .

$$B_{24} = \frac{1}{NT^4} \sum_{i \neq j} \sum_{t=1}^T \sum_{s \neq t} \sum_{l \neq s,t} E\xi_{it}\xi_{jt} E\zeta_{is}\zeta_{js} E\zeta_{il}\zeta_{jl} = O\left(\frac{1}{T}\right),$$

which is analyzed in the same way as  $B_{21}$ .

Finally,  $B_{25} = \frac{1}{NT^4} \sum_{i \neq j} \sum_{t=1}^T \sum_{s \neq t} \sum_{l \neq s,t} E\xi_{it}\zeta_{jt} E\zeta_{is}\xi_{js} E\zeta_{il}\zeta_{jl} = 0$ , because  $E\zeta_{is}\xi_{js} = 0$  when  $i \neq j$ , following from Lemma 1.3. Therefore,  $\frac{1}{T}B_2 = o(1) + O\left(\frac{N}{T^2}\right) = o(1)$ .

### Proof of (1.2)

For notational simplicity, let  $\xi_{ijt} = u_{it}u_{jt} - Eu_{it}u_{jt}$ . Because of the serial independence and the Gaussianity,  $\text{cov}(\xi_{ijt}, \zeta_{ls}\zeta_{nk}) = 0$  when either  $s \neq t$  or  $k \neq t$ , for any  $i, j, l, n \leq N$ . In addition, define a set

$$H = \{(i, j) \in S_U : i \neq j\}.$$

Then by the sparsity assumption,  $\sum_{(i,j) \in H} 1 = D_N = O(N)$ . Now let

$$Z = \frac{1}{\sqrt{NT}} \sum_{(i,j) \in H} \sum_{t=1}^T (u_{it}u_{jt} - Eu_{it}u_{jt}) \left[ \frac{1}{\sqrt{T}} \sum_{s=1}^T e_{is}(1 - \mathbf{f}'_s \mathbf{w}) \right] \left[ \frac{1}{\sqrt{T}} \sum_{k=1}^T e_{jk}(1 - \mathbf{f}'_k \mathbf{w}) \right]$$

$$= \frac{1}{\sqrt{NT}} \sum_{(i,j) \in H} \sum_{t=1}^T \xi_{ijt} \left[ \frac{1}{\sqrt{T}} \sum_{s=1}^T \zeta_{is} \right] \left[ \frac{1}{\sqrt{T}} \sum_{k=1}^T \zeta_{jk} \right] = \frac{1}{T\sqrt{NT}} \sum_{(i,j) \in H} \sum_{t=1}^T \sum_{s=1}^T \sum_{k=1}^T \xi_{ijt} \zeta_{is} \zeta_{jk}.$$

The goal is to show  $\frac{1}{T}EZ^2 = o(1)$ . We respectively show  $\frac{1}{T}(EZ)^2 = o(1) = \frac{1}{T}\text{var}(Z)$ .

### Expectation

The proof for the expectation is the same regardless of the type of sparsity in Assumption ??, and is very similar to that of (1.1). In fact,

$$EZ = \frac{1}{T\sqrt{NT}} \sum_{(i,j) \in H} \sum_{t=1}^T \sum_{s=1}^T \sum_{k=1}^T \text{cov}(\xi_{ijt}, \zeta_{is} \zeta_{jk}) = \frac{1}{T\sqrt{NT}} \sum_{(i,j) \in H} \sum_{t=1}^T \text{cov}(\xi_{ijt}, \zeta_{it}^2).$$

Because  $\sum_{(i,j) \in H} 1 = O(N)$ ,  $EZ = O(\sqrt{\frac{N}{T}})$ . Thus  $\frac{1}{T}(EZ)^2 = o(1)$ .

### Variance

For the variance, we have

$$\begin{aligned} \text{var}(Z) &= \frac{1}{T^3 N} \sum_{(i,j) \in H} \text{var} \left( \sum_{t=1}^T \sum_{s=1}^T \sum_{k=1}^T \xi_{ijt} \zeta_{is} \zeta_{jk} \right) \\ &\quad + \frac{1}{T^3 N} \sum_{(i,j) \in H, (m,n) \in H, (m,n) \neq (i,j), t,s,k,l,v,p \leq T} \text{cov}(\xi_{ijt} \zeta_{is} \zeta_{jk}, \xi_{mnl} \zeta_{mv} \zeta_{np}) \\ &= A_1 + A_2. \end{aligned}$$

By the Cauchy-Schwarz inequality and the serial independence of  $\xi_{ijt}$ ,

$$\begin{aligned} A_1 &\leq \frac{1}{N} \sum_{(i,j) \in H} E \left[ \frac{1}{\sqrt{T}} \sum_{t=1}^T \xi_{ijt} \frac{1}{\sqrt{T}} \sum_{s=1}^T \zeta_{is} \frac{1}{\sqrt{T}} \sum_{k=1}^T \zeta_{jk} \right]^2 \\ &\leq \frac{1}{N} \sum_{(i,j) \in H} [E(\frac{1}{\sqrt{T}} \sum_{t=1}^T \xi_{ijt})^4]^{1/2} [E(\frac{1}{\sqrt{T}} \sum_{s=1}^T \zeta_{is})^8]^{1/4} [E(\frac{1}{\sqrt{T}} \sum_{k=1}^T \zeta_{jk})^8]^{1/4}. \end{aligned}$$

So  $A_1 = O(1)$ .

Note that  $E\xi_{ijt} = E\zeta_{is} = 0$ , and when  $t \neq s$ ,  $\xi_{ijt} \perp \zeta_{ms}$ ,  $\xi_{ijt} \perp \xi_{mns}$ ,  $\zeta_{it} \perp \zeta_{js}$  (independent) for any  $i, j, m, n \leq N$ . Therefore, it is straightforward to verify that if the set  $\{t, s, k, l, v, p\}$  contains more than three distinct elements, then  $\text{cov}(\xi_{ijt} \zeta_{is} \zeta_{jk}, \xi_{mnl} \zeta_{mv} \zeta_{np}) = 0$ . Hence for the same set  $\Xi$  defined as before, it satisfies:



$|\Xi|_0 \leq CT^3$  for some  $C > 1$ , and

$$\sum_{t,s,k,l,v,p \leq T} \text{cov}(\xi_{ijt}\zeta_{is}\zeta_{jk}, \xi_{mnl}\zeta_{mv}\zeta_{np}) = \sum_{(t,s,k,l,v,p) \in \Xi} \text{cov}(\xi_{ijt}\zeta_{is}\zeta_{jk}, \xi_{mnl}\zeta_{mv}\zeta_{np}).$$

We proceed by studying the two cases of Assumption ?? separately, and show that in both cases  $\frac{1}{T}A_2 = o(1)$ . Once this is done, because we have just shown  $A_1 = O(1)$ , then  $\frac{1}{T}\text{var}(Z) = o(1)$ . The proof is then completed because  $\frac{1}{T}EZ^2 = \frac{1}{T}(EZ)^2 + \frac{1}{T}\text{var}(Z) = o(1)$ .

**When  $D_N = O(\sqrt{N})$**

Because  $|\Xi|_0 \leq CT^3$  and  $|H|_0 = D_N = O(\sqrt{N})$ , and  $|\text{cov}(\xi_{ijt}\zeta_{is}\zeta_{jk}, \xi_{mnl}\zeta_{mv}\zeta_{np})|$  is bounded uniformly in  $i, j, m, n \leq N$ , we have

$$\frac{1}{T}A_2 = \frac{1}{T^4N} \sum_{(i,j) \in H} \sum_{(m,n) \in H, (m,n) \neq (i,j)} \sum_{t,s,k,l,v,p \in \Xi} \text{cov}(\xi_{ijt}\zeta_{is}\zeta_{jk}, \xi_{mnl}\zeta_{mv}\zeta_{np}) = O\left(\frac{1}{T}\right).$$

**When  $D_n = O(N)$ , and  $m_N = O(1)$**

Similar to the proof of the first statement, for the same set  $\Xi_1$  that contains exactly three distinct indices in each of its element, (recall  $|H|_0 = O(N)$ )

$$\frac{1}{T}A_2 = \frac{1}{NT^4} \sum_{(i,j) \in H} \sum_{(m,n) \in H, (m,n) \neq (i,j)} \sum_{t,s,k,l,v,p \in \Xi_1} \text{cov}(\xi_{ijt}\zeta_{is}\zeta_{jk}, \xi_{mnl}\zeta_{mv}\zeta_{np}) + O\left(\frac{N}{T^2}\right).$$

The first term on the right hand side can be written as  $\sum_{h=1}^5 A_{2h}$ . Each of these five terms is defined and analyzed separately as below. Before that, let us introduce a useful lemma.

The following lemma is needed when  $\Sigma_u$  has bounded number of nonzero entries in each row ( $m_N = O(1)$ ). Let  $|S|_0$  denote the number of elements in a set  $S$  if  $S$  is countable. For any  $i \leq N$ , let

$$A(i) = \{j \leq N : \text{cov}(u_{it}, u_{jt}) \neq 0\} = \{j \leq N : (i, j) \in S_U\}.$$

**Lemma 1.4.** *Suppose  $m_N = O(1)$ . For any  $i, j \leq N$ , let  $B(i, j)$  be a set of  $k \in \{1, \dots, N\}$  such that:*

(i)  $k \notin A(i) \cup A(j)$

(ii) there is  $p \in A(k)$  such that  $\text{cov}(u_{it}u_{jt}, u_{kt}u_{pt}) \neq 0$ .

Then  $\max_{i,j \leq N} |B(i,j)|_0 = O(1)$ .

*Proof.* First we note that if  $B(i,j) = \emptyset$ , then  $|B(i,j)|_0 = 0$ . If it is not empty, for any  $k \in B(i,j)$ , by definition,  $k \notin A(i) \cup A(j)$ , which implies  $\text{cov}(u_{it}, u_{kt}) = \text{cov}(u_{jt}, u_{kt}) = 0$ . By the Gaussianity,  $u_{kt}$  is independent of  $(u_{it}, u_{jt})$ . Hence if  $p \in A(k)$  is such that  $\text{cov}(u_{it}u_{jt}, u_{kt}u_{pt}) \neq 0$ , then  $u_{pt}$  should be correlated with either  $u_{it}$  or  $u_{jt}$ . We thus must have  $p \in A(i) \cup A(j)$ . In other words, there is  $p \in A(i) \cup A(j)$  such that  $\text{cov}(u_{kt}, u_{pt}) \neq 0$ , which implies  $k \in A(p)$ . Hence,

$$k \in \bigcup_{p \in A(i) \cup A(j)} A(p) \equiv M(i,j),$$

and thus  $B(i,j) \subset M(i,j)$ . Because  $m_N = O(1)$ ,  $\max_{i \leq N} |A(i)|_0 = O(1)$ , which implies  $\max_{i,j} |M(i,j)|_0 = O(1)$ , yielding the result.  $\square$

Now we define and bound each of  $A_{2h}$ . For any  $(i,j) \in H = \{(i,j) : (\boldsymbol{\Sigma}_u)_{ij} \neq 0\}$ , we must have  $j \in A(i)$ . So

$$\begin{aligned} A_{21} &= \frac{1}{NT^4} \sum_{(i,j) \in H} \sum_{(m,n) \in H, (m,n) \neq (i,j)} \sum_{t=1}^T \sum_{s \neq t} \sum_{l \neq t, s} E \xi_{ijt} \xi_{mnt} E \zeta_{is} \zeta_{js} E \zeta_{ml} \zeta_{nl} \\ &\leq O\left(\frac{1}{NT}\right) \sum_{(i,j) \in H} \sum_{(m,n) \in H, (m,n) \neq (i,j)} |E \xi_{ijt} \xi_{mnt}| \\ &\leq O\left(\frac{1}{NT}\right) \sum_{(i,j) \in H} \left( \sum_{m \in A(i) \cup A(j)} \sum_{n \in A(m)} + \sum_{m \notin A(i) \cup A(j)} \sum_{n \in A(m)} \right) |\text{cov}(u_{it}u_{jt}, u_{mt}u_{nt})|. \end{aligned}$$

The first term is  $O(\frac{1}{T})$  because  $|H|_0 = O(N)$  and  $|A(i)|_0$  is bounded uniformly by  $m_N = O(1)$ . So the number of summands in  $\sum_{m \in A(i) \cup A(j)} \sum_{n \in A(m)}$  is bounded. For the second term, if  $m \notin A(i) \cup A(j)$ ,  $n \in A(m)$  and  $\text{cov}(u_{it}u_{jt}, u_{mt}u_{nt}) \neq 0$ , then  $m \in B(i,j)$ . Hence the second term is bounded by  $O(\frac{1}{NT}) \sum_{(i,j) \in H} \sum_{m \in B(i,j)} \sum_{n \in A(m)} |\text{cov}(u_{it}u_{jt}, u_{mt}u_{nt})|$ , which is also  $O(\frac{1}{T})$  by Lemma 1.4. Hence  $A_{21} = o(1)$ .

Similarly, applying Lemma 1.4,

$$A_{22} = \frac{1}{NT^4} \sum_{(i,j) \in H} \sum_{(m,n) \in H, (m,n) \neq (i,j)} \sum_{t=1}^T \sum_{s \neq t} \sum_{l \neq t, s} E \xi_{ijt} \xi_{mnt} E \zeta_{is} \zeta_{ms} E \zeta_{jl} \zeta_{nl} = o(1),$$

which is proved in the same lines of those of  $A_{21}$ .

Also note three simple facts: (1)  $\max_{j \leq N} |A(j)|_0 = O(1)$ , (2)  $(m,n) \in H$  implies

$n \in A(m)$ , and (3)  $\xi_{mms} = \xi_{nms}$ . The term  $A_{23}$  is defined as

$$\begin{aligned}
A_{23} &= \frac{1}{NT^4} \sum_{(i,j) \in H} \sum_{(m,n) \in H, (m,n) \neq (i,j)} \sum_{t=1}^T \sum_{s \neq t} \sum_{l \neq t, s} E \xi_{ijt} \zeta_{it} E \zeta_{js} \xi_{mns} E \zeta_{ml} \zeta_{nl} \\
&\leq O\left(\frac{1}{NT}\right) \sum_{j=1}^N \sum_{i \in A(j)} 1 \sum_{(m,n) \in H, (m,n) \neq (i,j)} |E \zeta_{js} \xi_{mns}| \\
&\leq O\left(\frac{2}{NT}\right) \sum_{j=1}^N \sum_{n \in A(j)} |E \zeta_{js} \xi_{jns}| + O\left(\frac{1}{NT}\right) \sum_{j=1}^N \sum_{m \neq j, n \neq j} |E \zeta_{js} \xi_{mns}| = a + b.
\end{aligned}$$

Term  $a = O(\frac{1}{T})$ . For  $b$ , note that Lemma 1.3 implies that when  $m, n \neq j$ ,  $u_{ms}u_{ns}$  and  $e_{js}$  are independent because of the Gaussianity. Also because  $\mathbf{u}_s$  and  $\mathbf{f}_s$  are independent, hence  $\zeta_{js}$  and  $\xi_{mms}$  are independent, which implies that  $b = 0$ . Hence  $A_{23} = o(1)$ .

The same argument as of  $A_{23}$  also implies

$$A_{24} = \frac{1}{NT^4} \sum_{(i,j) \in H} \sum_{(m,n) \in H, (m,n) \neq (i,j)} \sum_{t=1}^T \sum_{s \neq t} \sum_{l \neq t, s} E \xi_{ijt} \zeta_{mt} E \zeta_{is} \xi_{mns} E \zeta_{il} \zeta_{nl} = o(1)$$

Finally, because  $\sum_{(i,j) \in H} 1 \leq \sum_{i=1}^N \sum_{j \in A(i)} 1 \leq m_N \sum_{i=1}^N 1$ , and  $m_N = O(1)$ , we have

$$\begin{aligned}
A_{25} &= \frac{1}{NT^4} \sum_{(i,j) \in H} \sum_{(m,n) \in H, (m,n) \neq (i,j)} \sum_{t=1}^T \sum_{s \neq t} \sum_{l \neq t, s} E \xi_{ijt} \zeta_{it} E \zeta_{is} \zeta_{ms} E \xi_{mnl} \zeta_{nl} \\
&\leq O\left(\frac{1}{NT}\right) \sum_{(i,j) \in H} \sum_{(m,n) \in H, (m,n) \neq (i,j)} |E \xi_{ijt} \zeta_{it} E \zeta_{is} \zeta_{ms} E \xi_{mnl} \zeta_{nl}| \\
&\leq O\left(\frac{1}{NT}\right) \sum_{i=1}^N \sum_{m=1}^N |E \zeta_{is} \zeta_{ms}| \leq O\left(\frac{1}{NT}\right) \sum_{i=1}^N \sum_{m=1}^N |(\boldsymbol{\Sigma}_u^{-1})_{im}| E(1 - \mathbf{f}'_s \mathbf{w})^2 \\
&\leq O\left(\frac{N}{NT}\right) \|\boldsymbol{\Sigma}_u^{-1}\|_1 = o(1).
\end{aligned}$$

In summary,  $\frac{1}{T}A_2 = o(1) + O(\frac{N}{T^2}) = o(1)$ . This completes the proof.

## 2 Further technical lemmas for Section 4

We cite a lemma that will be needed throughout the proofs.

**Lemma 2.1.** Under Assumption ??, there is  $C > 0$ ,

- (i)  $P(\max_{i,j \leq N} |\frac{1}{T} \sum_{t=1}^T u_{it}u_{jt} - Eu_{it}u_{jt}| > C\sqrt{\frac{\log N}{T}}) \rightarrow 0$ .
- (ii)  $P(\max_{i \leq K, j \leq N} |\frac{1}{T} \sum_{t=1}^T f_{it}u_{jt}| > C\sqrt{\frac{\log N}{T}}) \rightarrow 0$ .
- (iii)  $P(\max_{j \leq N} |\frac{1}{T} \sum_{t=1}^T u_{jt}| > C\sqrt{\frac{\log N}{T}}) \rightarrow 0$ .

*Proof.* The proof follows from Lemmas A.3 and B.1 in ?. □

**Lemma 2.2.** When the distribution of  $(\mathbf{u}_t, \mathbf{f}_t)$  is independent of  $\boldsymbol{\theta}$ , there is  $C > 0$ ,

- (i)  $\sup_{\boldsymbol{\theta} \in \Theta} P(\max_{j \leq N} |\hat{\theta}_j - \theta_j| > C\sqrt{\frac{\log N}{T}}|\boldsymbol{\theta}) \rightarrow 0$
- (ii)  $\sup_{\boldsymbol{\theta} \in \Theta} P(\max_{i,j \leq N} |\hat{\sigma}_{ij} - \sigma_{ij}| > C\sqrt{\frac{\log N}{T}}|\boldsymbol{\theta}) \rightarrow 0$ ,
- (iii)  $\sup_{\boldsymbol{\theta} \in \Theta} P(\max_{i \leq N} |\hat{\sigma}_i - \sigma_i| > C\sqrt{\frac{\log N}{T}}|\boldsymbol{\theta}) \rightarrow 0$ .

*Proof.* Note that  $\hat{\theta}_j - \theta_j = \frac{1}{a_{f,T}} \sum_{t=1}^T u_{jt}(1 - \mathbf{f}'_t \mathbf{w})$ . Here  $a_{f,T} = 1 - \bar{\mathbf{f}}' \mathbf{w} \xrightarrow{p} 1 - E\mathbf{f}'_t(E\mathbf{f}_t \mathbf{f}'_t)^{-1} E\mathbf{f}_t > 0$ , hence  $a_{f,T}$  is bounded away from zero with probability approaching one. Thus by Lemma 2.1, there is  $C > 0$  independent of  $\boldsymbol{\theta}$ , such that

$$\sup_{\boldsymbol{\theta} \in \Theta} P(\max_{j \leq N} |\hat{\theta}_j - \theta_j| > C\sqrt{\frac{\log N}{T}}|\boldsymbol{\theta}) = P(\max_j |\frac{1}{a_{f,T}} \sum_{t=1}^T u_{jt}(1 - \mathbf{f}'_t \mathbf{w})| > C\sqrt{\frac{\log N}{T}}) \rightarrow 0$$

(ii) There is  $C$  independent of  $\boldsymbol{\theta}$ , such that the event

$$A = \left\{ \max_{i,j} \left| \frac{1}{T} \sum_{t=1}^T u_{it}u_{jt} - \sigma_{ij} \right| < C\sqrt{\frac{\log N}{T}}, \quad \frac{1}{T} \sum_{t=1}^T \|\mathbf{f}_t\|^2 < C \right\}$$

has probability approaching one. Also, there is  $C_2$  also independent of  $\boldsymbol{\theta}$  such that the event  $B = \{\max_i \frac{1}{T} \sum_t u_{it}^2 < C_2\}$  occurs with probability approaching one. Then on the event  $A \cap B$ , by the triangular and Cauchy-Schwarz inequalities,

$$|\hat{\sigma}_{ij} - \sigma_{ij}| \leq C\sqrt{\frac{\log N}{T}} + 2 \max_i \sqrt{\frac{1}{T} \sum_t (\hat{u}_{it} - u_{it})^2} C_2 + \max_i \frac{1}{T} \sum_t (u_{it} - \hat{u}_{it})^2.$$

It can be shown that

$$\max_{i \leq N} \frac{1}{T} \sum_{t=1}^T (\hat{u}_{it} - u_{it})^2 \leq \max_i (\|\hat{\mathbf{b}}_i - \mathbf{b}_i\|^2 + (\hat{\theta}_i - \theta_i)^2) \left( \frac{1}{T} \sum_{t=1}^T \|\mathbf{f}_t\|^2 + 1 \right).$$

Note that  $\hat{\mathbf{b}}_i - \mathbf{b}_i$  and  $\hat{\theta}_i - \theta_i$  only depend on  $(\mathbf{f}_t, \mathbf{u}_t)$  (independent of  $\boldsymbol{\theta}$ ). By Lemma 3.1

of ?, there is  $C_3 > 0$  such that  $\sup_{\mathbf{b}, \boldsymbol{\theta}} P(\max_{i \leq N} \|\widehat{\mathbf{b}}_i - \mathbf{b}_i\|^2 + (\widehat{\theta}_i - \theta_i)^2 > C_3 \frac{\log N}{T}) = o(1)$ . Combining the last two displayed inequalities yields, for  $C_4 = (C + 1)C_3$ ,

$$\sup_{\boldsymbol{\theta}} P(\max_{i \leq N} \frac{1}{T} \sum_{t=1}^T (\widehat{u}_{it} - u_{it})^2 > C_4 \frac{\log N}{T} | \boldsymbol{\theta}) = o(1),$$

which yields the desired result.

(iii): Recall  $\widehat{\sigma}_j^2 = \widehat{\sigma}_{jj}/a_{f,T}$ , and  $\sigma_j^2 = \sigma_{jj}/(1 - E\mathbf{f}'_t(E\mathbf{f}_t\mathbf{f}'_t)^{-1}E\mathbf{f}_t)$ . Moreover,  $a_{f,T}$  is independent of  $\boldsymbol{\theta}$ . The result follows immediately from part (ii).  $\square$

**Lemma 2.3.** *For any  $\epsilon > 0$ ,  $\sup_{\boldsymbol{\theta}} P(\|\widehat{\boldsymbol{\Sigma}}_u^{-1} - \boldsymbol{\Sigma}_u^{-1}\| > \epsilon | \boldsymbol{\theta}) = o(1)$ .*

*Proof.* By Lemma 2.2 (ii),  $\sup_{\boldsymbol{\theta} \in \Theta} P(\max_{i,j \leq N} |\widehat{\sigma}_{ij} - \sigma_{ij}| > C \sqrt{\frac{\log N}{T}} | \boldsymbol{\theta}) \rightarrow 1$ . By ?, on the event  $\max_{i,j \leq N} |\widehat{\sigma}_{ij} - \sigma_{ij}| \leq C \sqrt{\frac{\log N}{T}}$ , there is constant  $C'$  that is independent of  $\boldsymbol{\theta}$ ,  $\|\widehat{\boldsymbol{\Sigma}}_u^{-1} - \boldsymbol{\Sigma}_u^{-1}\| \leq C' m_N (\frac{\log N}{T})^{1/2}$ . Hence the result follows due to the sparse condition  $m_N (\frac{\log N}{T})^{1/2} = o(1)$ .  $\square$
